# Supplementary material
Source: publisher site journal article supplement (https://www.dovepress.com/article/544354)

# SUPPLEMENTARY MATERIAL

**Supplementary Figure 1** presents the distributions of the continuous predictors, namely age (A) and cataract score (B).

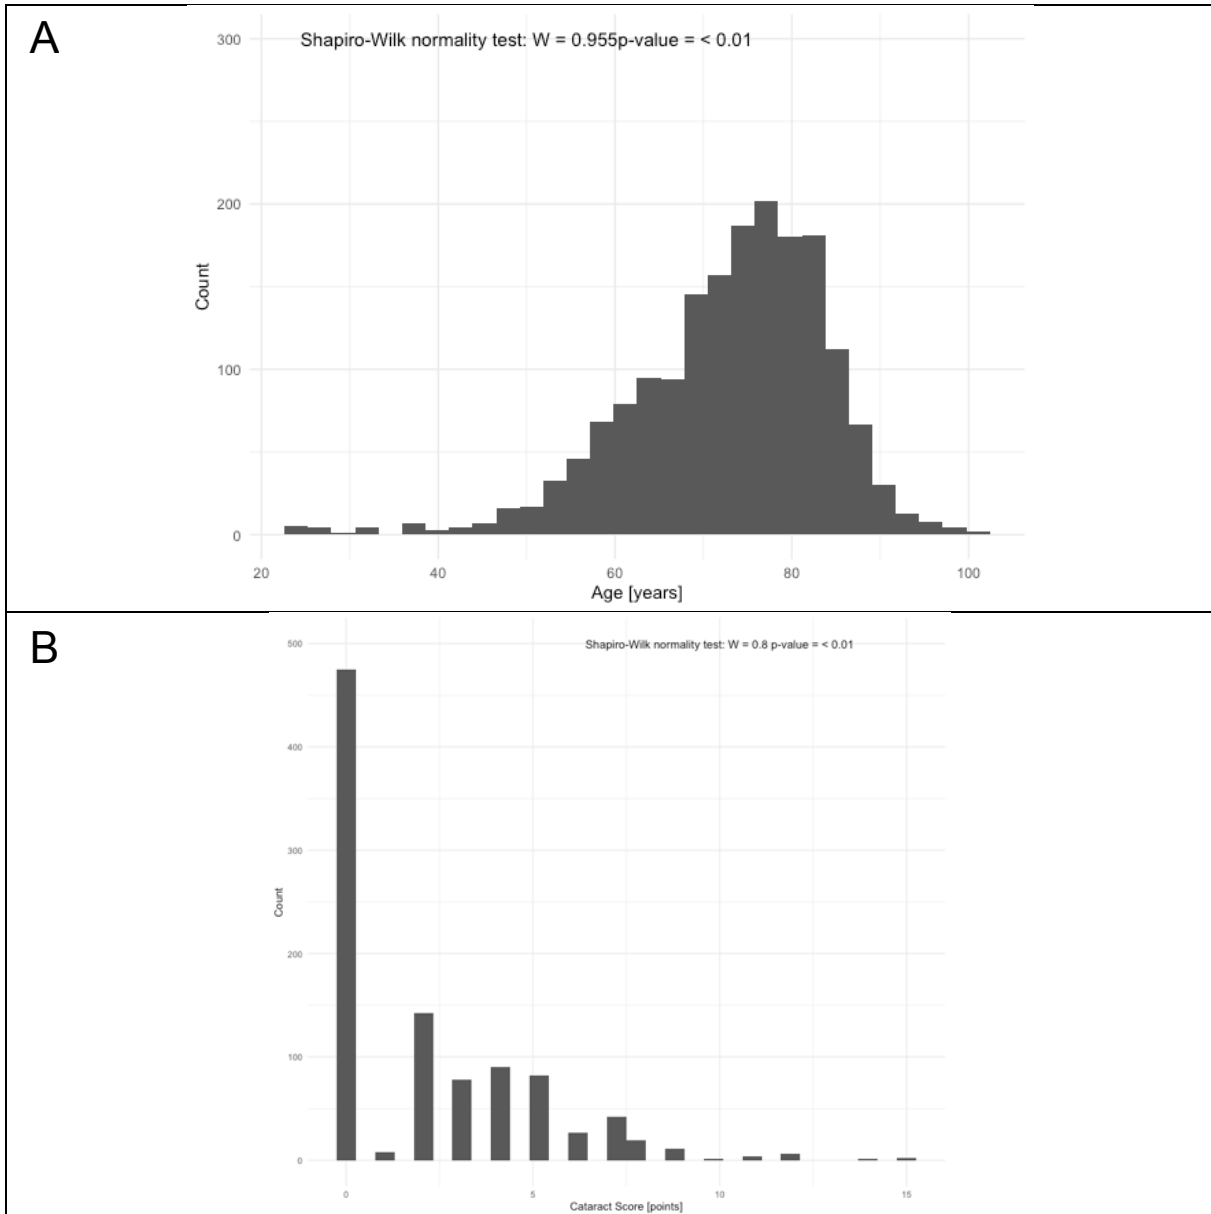

**Supplementary Figure 2** illustrates the theoretically achievable power of the study across a range of odds ratios. The purpose of this figure is to show which effect sizes could be reliably detected given the sample size and event rate of the study.

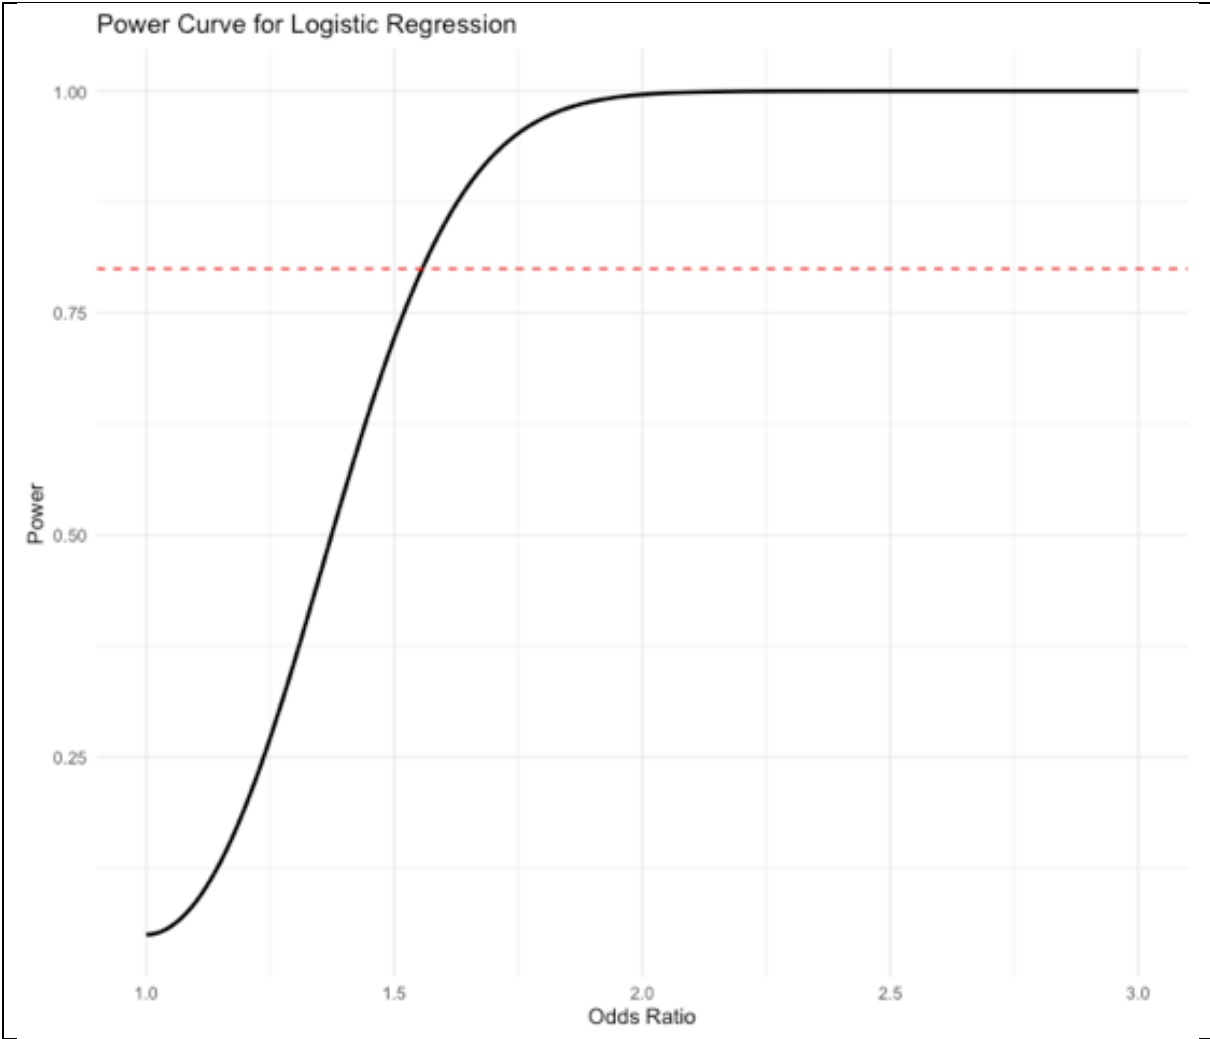

Supplement: Supplementary file 1 [file 544354%20Supplementary%20file.pdf]
